# Supplementary material
Source: PubMed Central journal article supplement (PMC2846038)
Supplement: JCI38793sd.pdf [file JCI38793sd.pdf]

# Supplementary figure 1

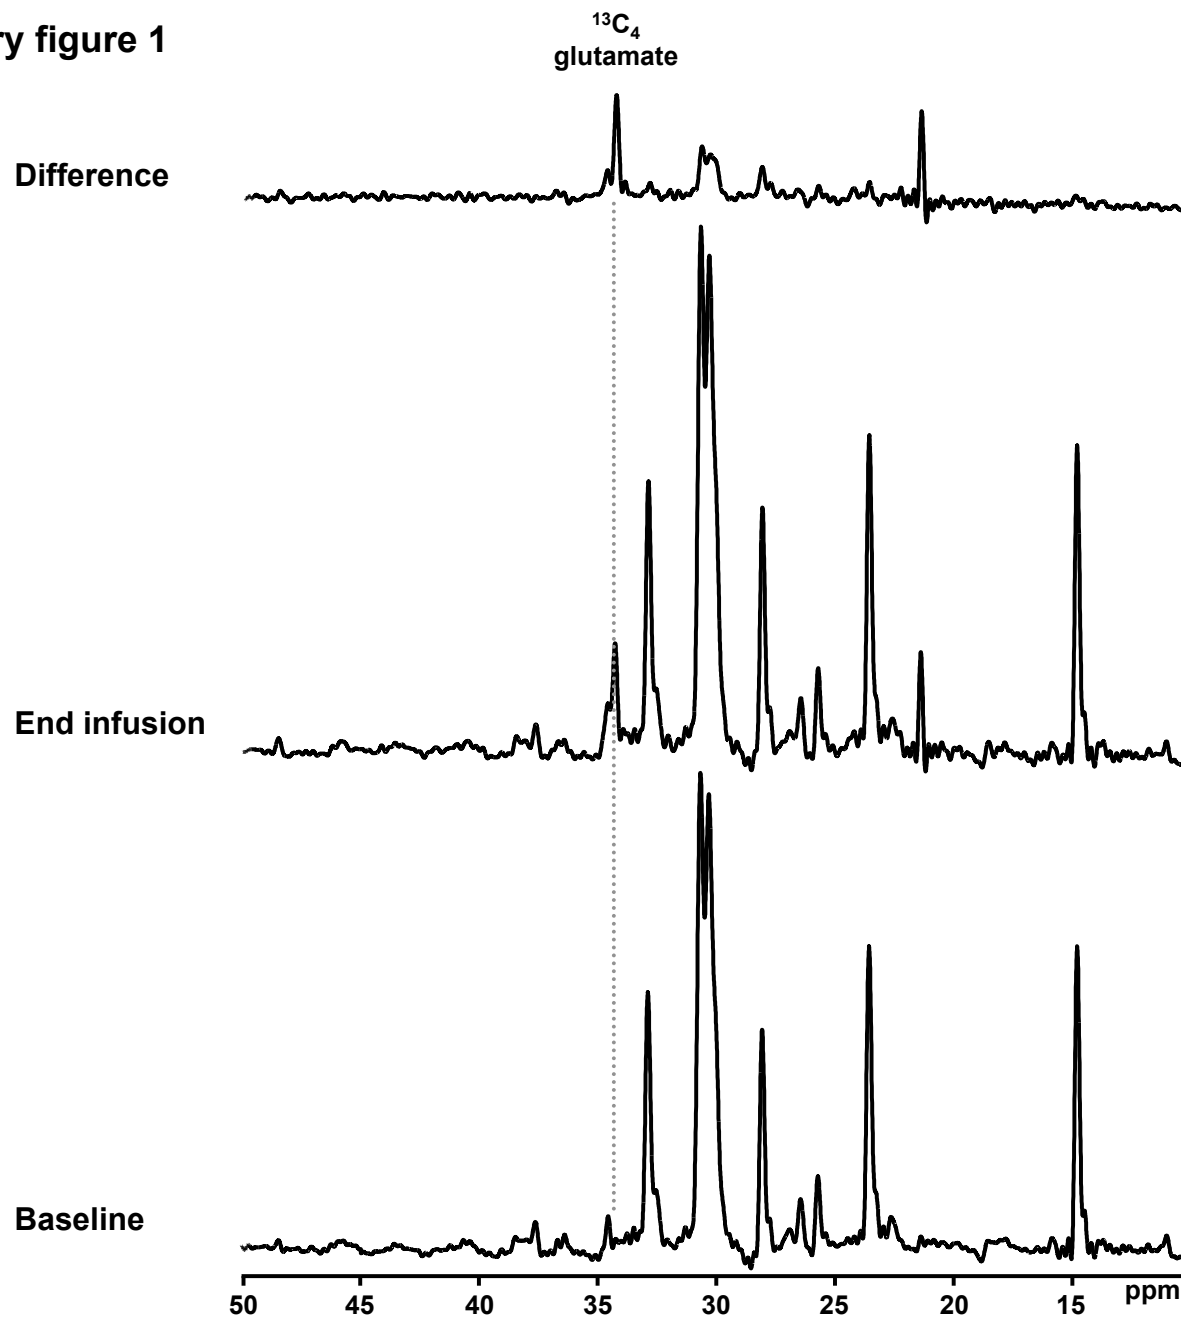

Supplementary figure 2

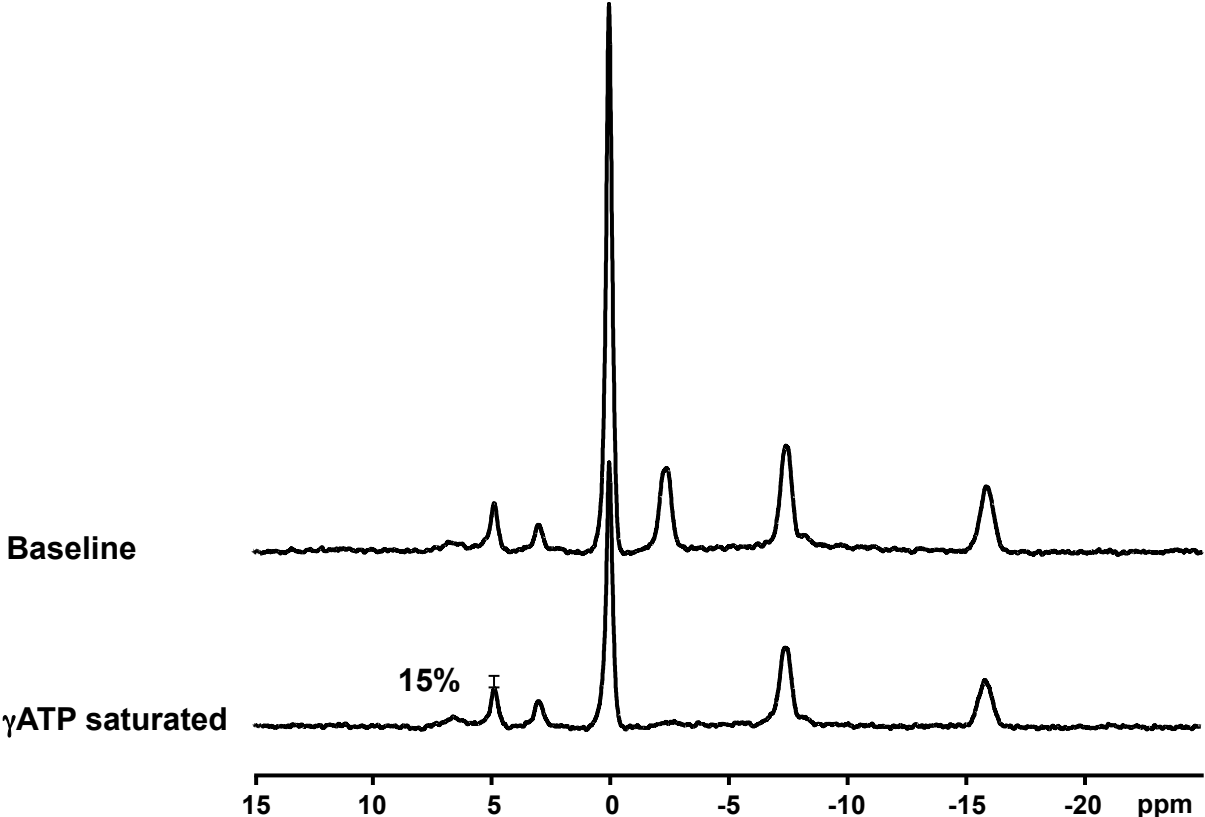

**Supplementary Figure 1**  $^{13}\text{C}[^1\text{H}]$  Polarization-transfer spectra acquired from an RTH subject prior to (baseline) and at the end of the 120 minute infusion (end infusion) of  $[2\text{-}^{13}\text{C}]$  acetate. A difference (subtraction) spectrum is also included.

**Supplementary Figure 2** Two  $^{31}\text{P}$  MR spectra (baseline and  $\gamma\text{ATP}$  saturated) recorded during the saturation transfer experiment on a RTH patient. The comparison of the two MR spectra shows a transfer of  $\sim 15\%$ .
